# Supplementary material for: Chiral zero-dimensional hybrid organic–inorganic metal halides based on nipecotic acid and tetrabromocuprate
Source: Royal Society of Chemistry journal article supplement (doi:10.1039/d3nj05858a), 2024-01-01
Supplement: d3nj05858a1.pdf [file d3nj05858a1.pdf]

## *Supplementary Information*

### **Chiral zero-dimensional hybrid organic–inorganic metal halides based on nipecotic acids and tetrabromocuprate**

**Xianran Wang,<sup>†a,b</sup> Yuying Wu,<sup>‡c</sup> Feng Gao<sup>\*a</sup> and Youfu Wang<sup>\*b</sup>**

<sup>a</sup>. State Key Laboratory of Featured Metal Materials and Life-cycle Safety for Compo-site Structures, School of Resources, Environment and Materials, Guangxi University, Nanning 530004, P. R. China.  
E-mail: gaofeng@gxu.edu.cn

<sup>b</sup>. School of Chemistry and Chemical Engineering, Frontiers Science Center for Transformative Molecules, Shanghai Jiao Tong University, Shanghai 200240, P. R. China.

E-mail: wyfown@sjtu.edu.cn

<sup>c</sup>. School of Electrical Engineering, Shanghai DianJi University, Shanghai 201306, P. R. China.

<sup>†</sup> XR.W and <sup>‡</sup> YY. W. contributed equally to this work.

#### **Materials Synthesis and Characterizations**

**Figure S1.** Photograph of (a)  $[S\text{-NA}]_2[\text{CuBr}_4]$  and (b)  $[R\text{-NA}]_2[\text{CuBr}_4]$ .

**Figure S2.** XPS spectra of (a)  $[S\text{-NA}]_2[\text{CuBr}_4]$  and (b)  $[R\text{-NA}]_2[\text{CuBr}_4]$ .

**Figure S3.** SEM and EDS mapping images of (a)  $[S\text{-NA}]_2[\text{CuBr}_4]$  and (b)  $[R\text{-NA}]_2[\text{CuBr}_4]$ .

**Figure S4.** CD spectra of (S)-(+)-NA and (R)-(-)-NA.

**Figure S5.** Powder XRD patterns of as-prepared (S)-(+)-NA and (R)-(-)-NA thin films overlapped with that of the (S)-(+)-NA and (R)-(-)-NA single crystals.

**Table S1.** Crystal data and structure refinement for  $[S\text{-NA}]_2[\text{CuBr}_4]$  and  $[R\text{-NA}]_2[\text{CuBr}_4]$ .

**Table S2.** Bond lengths for  $[S\text{-NA}]_2[\text{CuBr}_4]$ .

**Table S3.** Bond lengths for  $[R\text{-NA}]_2[\text{CuBr}_4]$ .

**Table S4.** Bond angles for  $[S\text{-NA}]_2[\text{CuBr}_4]$ .

**Table S5.** Bond angles for  $[R\text{-NA}]_2[\text{CuBr}_4]$ .

## Materials Synthesis and Characterizations

### Materials

(S)-(+)-NA, (R)-(-)-NA, copper bromide ( $\text{CuBr}_2$ ) and hydrobromic acid in analytically pure were purchased from Adamas Reagent Company and used directly without purification.

### Synthesis of chiral hybrid organic–inorganic metal halides

$[\text{S-NA}]_2[\text{CuBr}_4]$  and  $[\text{R-NA}]_2[\text{CuBr}_4]$  single crystals were synthesized at room temperature using the commonly used solution evaporation method. The specific method was as follows: NA (5 mmol) and  $\text{CuBr}_2$  (2.5 mmol) were first dissolved in an appropriate amount of water and hydrobromic acid (5 mL), respectively, and then the aqueous solution and the acid solution are fully mixed to obtain the purple black mixed solution. The mixed solution was placed in a fume hood and evaporated slowly at common atmosphere. After a few days, small black crystals were observed, indicating that the target single crystals were obtained.

### Structural Characterization

Single Crystal X-ray Diffraction (SCXRD) data has been acquired on a D8 VENTURE type of diffractometer with an X-ray source: a high intensity microfocused rotating anode source, Cu  $\text{K}\alpha$  target. The appropriate single crystals were scrutinized with an optical microscope and affixed to the fine glass fibers. Fourier synthesis calculations were derived by parsing and completing the single-crystal structure information using an adapted version of the SHELXL-97 program included in the OLEX2 package.

Powder X-ray diffraction (PXRD) data were collected at a D8 Advance-type X-ray diffractometer, Cu  $\text{K}\alpha$  palladium, scan range  $2\theta$  is  $5\sim 90^\circ$ . The XPS of individual crystals were recorded on the Nexsa instrument equipped with a monochromatic Al  $\text{K}\alpha$  microfocus X-ray source. An instrument model FEI Apreo 2S HiVac field emission scanning electron microscope, with an X-ray energy spectrometer, was used to observe the microstructure and energy spectrum acquisition.

The Raman spectra for the single crystals were acquired with the DXR Raman spectrometer. The Raman spectra were recorded from polycrystalline samples in the  $3500\sim 50\text{ cm}^{-1}$  range using a physical argon ion laser with a 523 nm spectral line. The solid-state CD spectroscopy measurements were performed on a Jasco-1500 CD polarization spectrometer. At  $19.85^\circ\text{C}$ , the measurement wavelength range was  $200\sim 300\text{ nm}$ . The synthesized crystals were first

dissolved in DMF solution, and then coated on the quartz substrate to prepare a continuous  $[S\text{-NA}]_2[\text{CuBr}_4]$  and  $[R\text{-NA}]_2[\text{CuBr}_4]$  film for CD spectroscopy.

### **Spectroscopic measurement**

The ultraviolet-visible spectra (UV-vis) of the single crystals  $[S\text{-NA}]_2[\text{CuBr}_4]$  and  $[R\text{-NA}]_2[\text{CuBr}_4]$  were measured within the range of 200-800 nm with a conventional UV-visible absorption spectrometer Lambda 750S in a room temperature, and spectrally pure  $\text{BaSO}_4$  solid powders were firstly tested, which was used for calibration. After the test, a small amount of the sample was flattened in the center of a mold with  $\text{BaSO}_4$  solid powder and tested.

The Raman spectra for the single crystals were acquired with the DXR Raman spectrometer. The Raman spectra were recorded from polycrystalline samples in the  $3500\sim 50\text{ cm}^{-1}$  range using a physical argon ion laser with a 523 nm spectral line. The solid-state CD spectroscopy measurements were performed on a Jasco-1500 CD polarization spectrometer. At  $19.85\text{ }^\circ\text{C}$ , the measurement wavelength range was  $200\sim 300\text{ nm}$ . The synthesized crystals were first dissolved in DMF solution, and then coated on the quartz substrate to prepare a continuous  $[S\text{-NA}]_2[\text{CuBr}_4]$  and  $[R\text{-NA}]_2[\text{CuBr}_4]$  film for CD spectroscopy.

### **Thermal test**

The differential scanning calorimetry (DSC) measurements were made on the NETZSCH DSC 214 instrument. The thermal properties of single crystal  $[S\text{-NA}]_2[\text{CuBr}_4]$  and  $[R\text{-NA}]_2[\text{CuBr}_4]$  were studied by DSC. The temperature range was  $-70\sim 150\text{ }^\circ\text{C}$  and the DSC changes of the samples during cooling and heating were recorded at a temperature variation occurs at a speed of  $10\text{ }^\circ\text{C}/\text{min}$ .

Thermogravimetric analysis (TGA) and DTG measurements were performed on the NETZSCH TG 209F1 Libra instrument by placing approximately 10 mg of powder in an alumina crucible with a temperature scale of  $30\sim 910\text{ }^\circ\text{C}$ . The sample was heated at the speed of  $10\text{ }^\circ\text{C}/\text{min}$  under nitrogen.

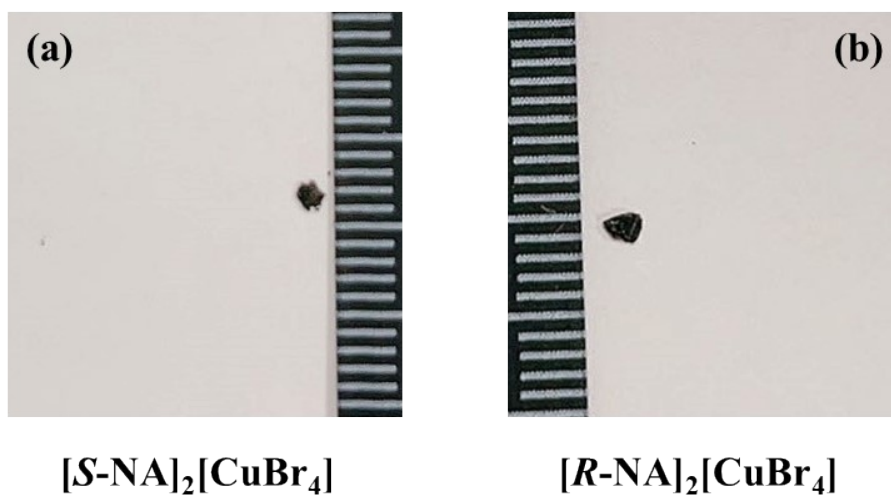

**Figure S1.** Photograph of (a)  $[S-NA]_2[CuBr_4]$  and (b)  $[R-NA]_2[CuBr_4]$ .

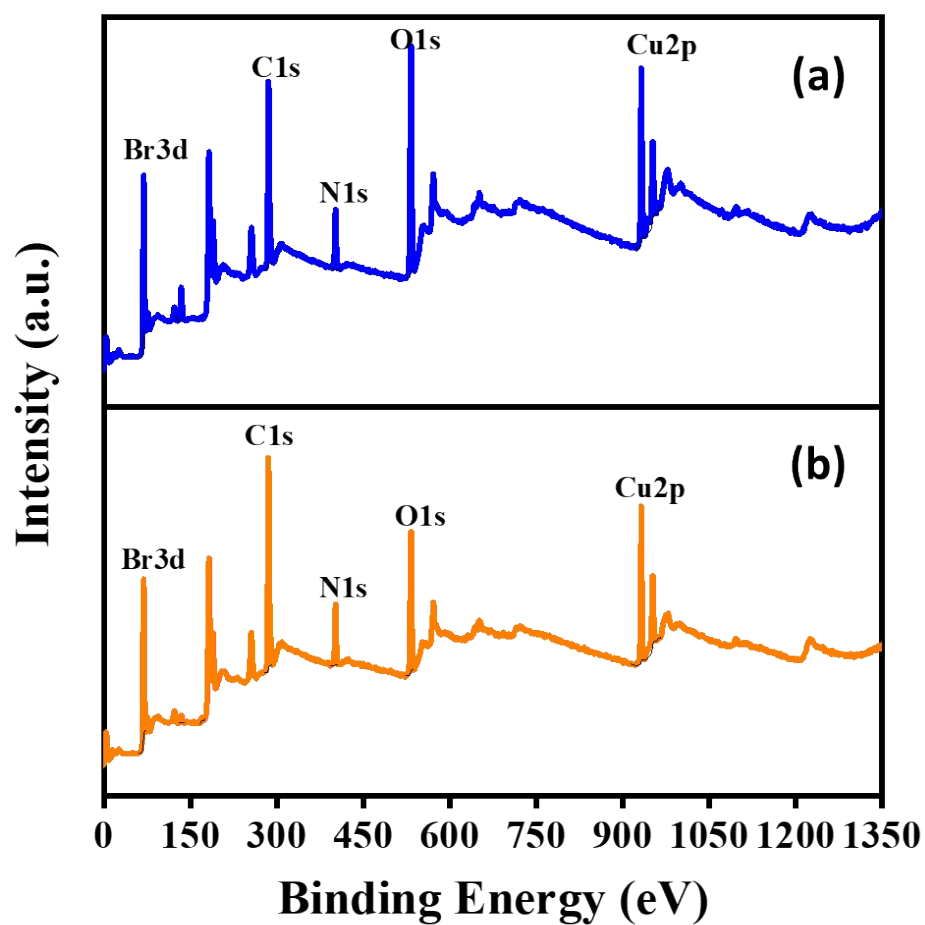

**Figure S2.** XPS spectra of (a)  $[S-NA]_2[CuBr_4]$  and (b)  $[R-NA]_2[CuBr_4]$ .

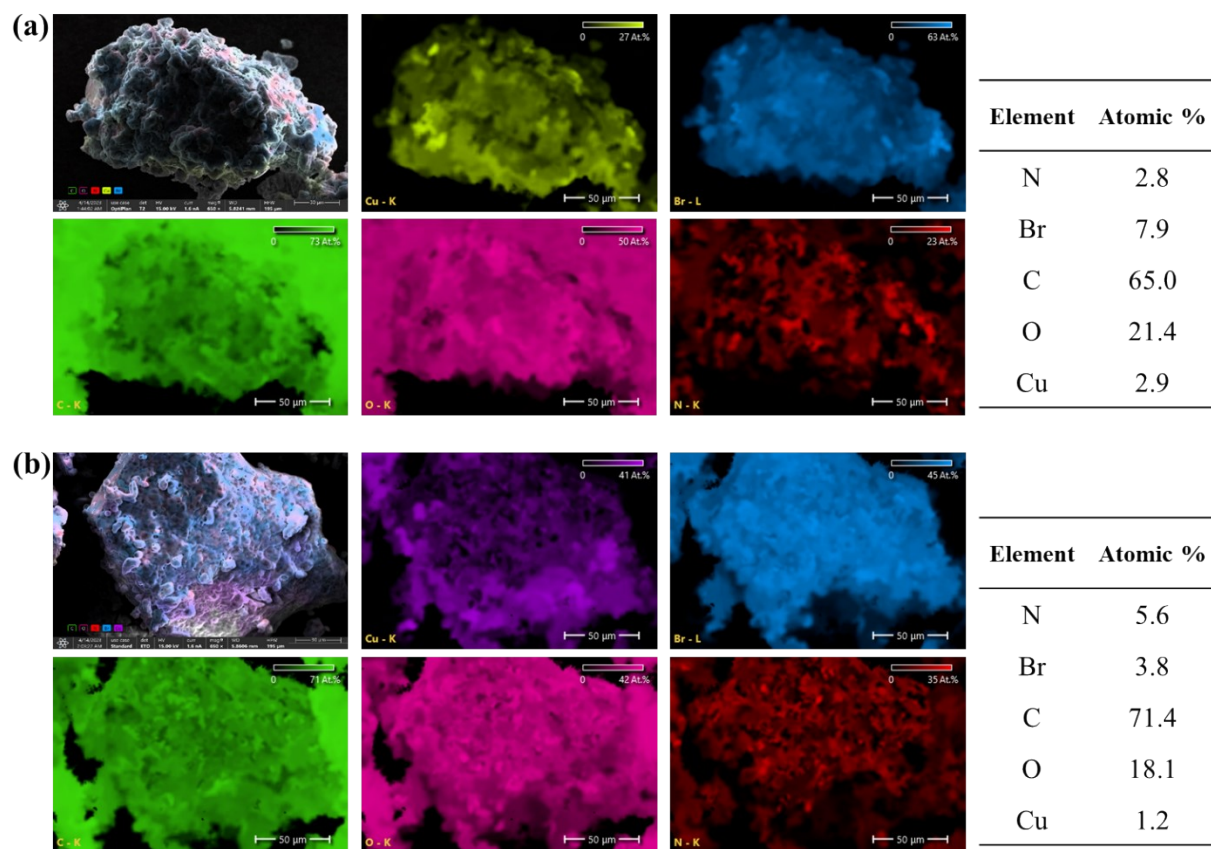

**Figure S3.** SEM and EDS mapping images of (a)  $[S-NA]_2[CuBr_4]$  and (b)  $[R-NA]_2[CuBr_4]$ .

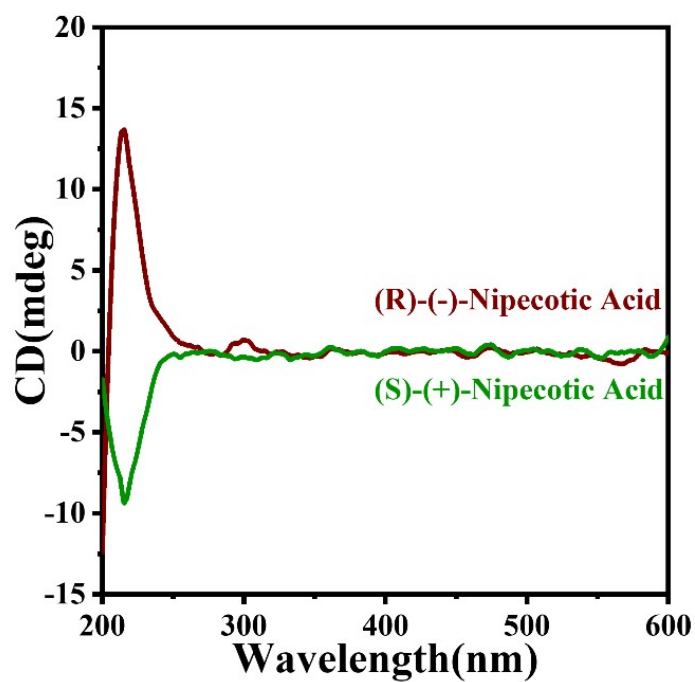

**Figure S4.** CD spectra of (S)-(+)-NA and (R)-(-)-NA.

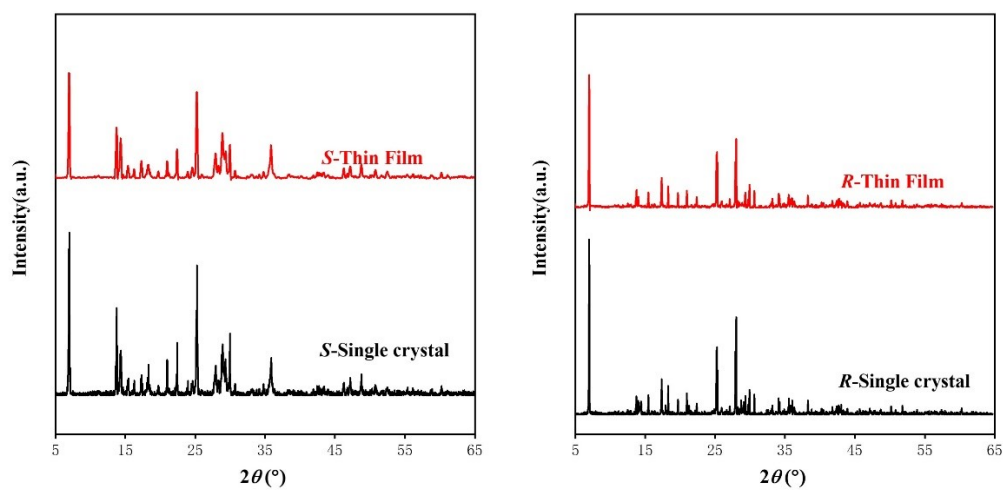

**Figure S5.** Powder XRD patterns of as-prepared (S)-(+)-NA and (R)-(-)-NA thin films overlapped with that of the (S)-(+)-NA and (R)-(-)-NA single crystals.

**Table S1.** Crystal data and structure refinement for [*S*-NA]<sub>2</sub>[CuBr<sub>4</sub>] and [*R*-NA]<sub>2</sub>[CuBr<sub>4</sub>].

| Empirical formula                        | [ <i>S</i> -C <sub>6</sub> H <sub>12</sub> NO <sub>2</sub> ] <sub>2</sub> [CuBr <sub>4</sub> ] | [ <i>R</i> -C <sub>6</sub> H <sub>12</sub> NO <sub>2</sub> ] <sub>2</sub> [CuBr <sub>4</sub> ] |
|------------------------------------------|------------------------------------------------------------------------------------------------|------------------------------------------------------------------------------------------------|
| Formula weight/g mol <sup>-1</sup>       | 643.51                                                                                         | 643.51                                                                                         |
| Crystal system                           | orthorhombic                                                                                   | orthorhombic                                                                                   |
| Space group                              | C222 <sub>1</sub>                                                                              | C222 <sub>1</sub>                                                                              |
| T/K                                      | 296                                                                                            | 296                                                                                            |
| a/ Å                                     | 8.3889(5)                                                                                      | 9.8431(10)                                                                                     |
| b/ Å                                     | 9.8846(7)                                                                                      | 8.4200(9)                                                                                      |
| c/ Å                                     | 25.0684(17)                                                                                    | 25.190(2)                                                                                      |
| α/β/γ(°)                                 | 90/90/90                                                                                       | 90/90/90                                                                                       |
| Volume/ Å <sup>3</sup>                   | 2078.7(2)                                                                                      | 2087.7(3)                                                                                      |
| Z                                        | 4                                                                                              | 4                                                                                              |
| Density/g cm <sup>-3</sup>               | 2.056                                                                                          | 2.047                                                                                          |
| Radiation                                | CuKα (λ = 1.54178)                                                                             | CuKα (λ = 1.54184)                                                                             |
| μ/mm <sup>-1</sup>                       | 10.646                                                                                         | 10.600                                                                                         |
| F(000)                                   | 1244.0                                                                                         | 1244.0                                                                                         |
| Thetarang(data collection)               | 13.846 to 136.652                                                                              | 7.018 to 136.68                                                                                |
| Index ranges                             | -10 ≤ h ≤ 10, -11 ≤ k ≤ 11,<br>-29 ≤ l ≤ 30                                                    | -11 ≤ h ≤ 11, -9 ≤ k ≤ 10,<br>-30 ≤ l ≤ 30                                                     |
| Reflections colleted                     | 15127                                                                                          | 10882                                                                                          |
| Independent reflections                  | 1902                                                                                           | 1909                                                                                           |
|                                          | [R <sub>int</sub> = 0.0501, R <sub>sigma</sub> = 0.0282]                                       | [R <sub>int</sub> = 0.0466, R <sub>sigma</sub> = 0.0358]                                       |
| Data/restraints/parameters               | 1902/50/163                                                                                    | 1909/56/160                                                                                    |
| Goodness-of-fit on F <sup>2</sup>        | 1.054                                                                                          | 1.097                                                                                          |
| Final R indexes[I ≥ 2σ(I)]               | R <sub>1</sub> = 0.0294, wR <sub>2</sub> = 0.0789                                              | R <sub>1</sub> = 0.0370, wR <sub>2</sub> = 0.1023                                              |
| Final R indexes[all data]                | R <sub>1</sub> = 0.0325, wR <sub>2</sub> = 0.0806                                              | R <sub>1</sub> = 0.0383, wR <sub>2</sub> = 0.1039                                              |
| Largest diff.peak/hole/e Å <sup>-3</sup> | 0.33/-0.33                                                                                     | 0.39/-0.59                                                                                     |
| Flack parameter                          | 0.08(5)                                                                                        | 0.22(7)                                                                                        |

**Table S2.** Bond lengths for [*S*-NA]<sub>2</sub>[CuBr<sub>4</sub>].

| Atom            | Atom                         | Length/Å  | Atom            | Atom                         | Length/Å  |
|-----------------|------------------------------|-----------|-----------------|------------------------------|-----------|
| Br <sub>5</sub> | Cu <sub>1</sub> <sup>1</sup> | 2.393(2)  | C <sub>2</sub>  | C <sub>3</sub>               | 1.505(9)  |
| Br <sub>5</sub> | Cu <sub>1</sub>              | 2.393(2)  | C <sub>2</sub>  | C <sub>1</sub>               | 1.514(7)  |
| Br <sub>5</sub> | Cu <sub>2</sub>              | 2.2902(7) | O <sub>2</sub>  | C <sub>1</sub>               | 1.252(7)  |
| Br <sub>5</sub> | Cu <sub>2</sub> <sup>1</sup> | 2.2902(7) | N <sub>4</sub>  | C <sub>3</sub>               | 1.490(7)  |
| Br <sub>5</sub> | Cu <sub>3</sub>              | 2.417(6)  | N <sub>4</sub>  | C <sub>4</sub>               | 1.465(8)  |
| Br <sub>5</sub> | Cu <sub>3</sub> <sup>1</sup> | 2.491(6)  | C <sub>6</sub>  | C <sub>5</sub>               | 1.518(9)  |
| Br <sub>5</sub> | Cu <sub>4</sub>              | 2.447(13) | C <sub>4</sub>  | C <sub>5</sub>               | 1.492(10) |
| Br <sub>1</sub> | Cu <sub>1</sub> <sup>1</sup> | 2.395(4)  | Cu <sub>2</sub> | Cu <sub>2</sub> <sup>1</sup> | 0.00(2)   |
| Br <sub>1</sub> | Cu <sub>1</sub>              | 2.395(4)  | Cu <sub>2</sub> | Br <sub>2</sub>              | 2.469(10) |
| Br <sub>5</sub> | Cu <sub>1</sub> <sup>1</sup> | 2.393(2)  | C <sub>2</sub>  | C <sub>3</sub>               | 1.505(9)  |
| Br <sub>5</sub> | Cu <sub>1</sub>              | 2.393(2)  | C <sub>2</sub>  | C <sub>1</sub>               | 1.514(7)  |
| C <sub>2</sub>  | C <sub>6</sub>               | 1.509(8)  | Cu <sub>3</sub> | Br <sub>3</sub>              | 1.93(5)   |

<sup>1</sup>1-X,+Y,1/2-Z; <sup>2</sup>-1/2+X,-1/2+Y,+Z
**Table S3.** Bond lengths for [*R*-NA]<sub>2</sub>[CuBr<sub>4</sub>].

| Atom            | Atom                         | Length/Å   | Atom            | Atom            | Length/Å  |
|-----------------|------------------------------|------------|-----------------|-----------------|-----------|
| Br <sub>5</sub> | Cu <sub>2</sub>              | 2.2984(11) | C <sub>2</sub>  | C <sub>1</sub>  | 1.510(11) |
| Br <sub>5</sub> | Cu <sub>3</sub>              | 2.386(5)   | C <sub>2</sub>  | C <sub>3</sub>  | 1.493(11) |
| Br <sub>5</sub> | Cu <sub>3</sub> <sup>1</sup> | 2.538(5)   | C <sub>5</sub>  | C <sub>4</sub>  | 1.500(12) |
| Br <sub>5</sub> | Cu <sub>1</sub>              | 2.433(5)   | C <sub>5</sub>  | N <sub>1</sub>  | 1.464(10) |
| Br <sub>5</sub> | Cu <sub>4</sub>              | 2.347(17)  | C <sub>1</sub>  | N <sub>1</sub>  | 1.504(9)  |
| Cu <sub>2</sub> | Br <sub>2</sub> <sup>1</sup> | 2.444(12)  | C <sub>3</sub>  | C <sub>4</sub>  | 1.538(10) |
| Cu <sub>2</sub> | Br <sub>2</sub>              | 2.444(12)  | Br <sub>4</sub> | Cu <sub>4</sub> | 2.48(4)   |
| O <sub>1</sub>  | C <sub>6</sub>               | 1.265(9)   | Cu <sub>3</sub> | Br <sub>3</sub> | 1.96(4)   |
| O <sub>2</sub>  | C <sub>6</sub>               | 1.244(8)   | Br <sub>1</sub> | Cu <sub>1</sub> | 2.323(10) |
| C <sub>2</sub>  | C <sub>6</sub>               | 1.504(8)   |                 |                 |           |

<sup>1</sup>+X,1-Y,1-Z

**Table S4.** Bond angles for [S-NA]<sub>2</sub>[CuBr<sub>4</sub>].

| Atom                         | Atom            | Atom                         | Angle/°   | Atom                         | Atom            | Atom                         | Angle/°   |
|------------------------------|-----------------|------------------------------|-----------|------------------------------|-----------------|------------------------------|-----------|
| Cu <sub>1</sub>              | Br <sub>5</sub> | Cu <sub>1</sub> <sup>1</sup> | 0.0(4)    | N <sub>4</sub>               | C <sub>4</sub>  | C <sub>5</sub>               | 111.5(6)  |
| Cu <sub>1</sub> <sup>1</sup> | Br <sub>5</sub> | Cu <sub>3</sub> <sup>1</sup> | 27.78(19) | C <sub>4</sub>               | C <sub>5</sub>  | C <sub>6</sub>               | 112.3(5)  |
| Cu <sub>1</sub>              | Br <sub>5</sub> | Cu <sub>3</sub> <sup>1</sup> | 27.78(19) | Br <sub>5</sub>              | Cu <sub>2</sub> | Br <sub>5</sub> <sup>1</sup> | 179.3(6)  |
| Cu <sub>2</sub> <sup>1</sup> | Br <sub>5</sub> | Cu <sub>2</sub>              | 0.0(6)    | Br <sub>5</sub>              | Cu <sub>2</sub> | Br <sub>2</sub>              | 88.7(2)   |
| Cu <sub>1</sub> <sup>1</sup> | Br <sub>1</sub> | Cu <sub>1</sub>              | 0.000(1)  | Br <sub>5</sub> <sup>1</sup> | Cu <sub>2</sub> | Br <sub>2</sub>              | 91.7(2)   |
| Br <sub>5</sub>              | Cu <sub>1</sub> | Br <sub>5</sub> <sup>1</sup> | 146.3(4)  | Br <sub>5</sub> <sup>1</sup> | Cu <sub>2</sub> | Br <sub>2</sub> <sup>1</sup> | 88.7(2)   |
| Br <sub>5</sub> <sup>1</sup> | Cu <sub>1</sub> | Br <sub>1</sub> <sup>1</sup> | 96.75(4)  | Br <sub>5</sub>              | Cu <sub>2</sub> | Br <sub>2</sub> <sup>1</sup> | 91.7(2)   |
| Br <sub>5</sub> <sup>1</sup> | Cu <sub>1</sub> | Br <sub>1</sub>              | 97.88(5)  | Cu <sub>2</sub> <sup>1</sup> | Cu <sub>2</sub> | Br <sub>5</sub>              | 0(10)     |
| Br <sub>5</sub>              | Cu <sub>1</sub> | Br <sub>1</sub>              | 96.75(4)  | Cu <sub>2</sub> <sup>1</sup> | Cu <sub>2</sub> | Br <sub>2</sub> <sup>1</sup> | 0(10)     |
| Br <sub>5</sub>              | Cu <sub>1</sub> | Br <sub>1</sub> <sup>1</sup> | 97.88(5)  | Cu <sub>2</sub> <sup>1</sup> | Cu <sub>2</sub> | Br <sub>2</sub>              | 0(10)     |
| Br <sub>1</sub> <sup>1</sup> | Cu <sub>1</sub> | Br <sub>1</sub>              | 127.8(4)  | Br <sub>2</sub>              | Cu <sub>2</sub> | Br <sub>2</sub> <sup>1</sup> | 108.4(6)  |
| Cu <sub>1</sub> <sup>1</sup> | Cu <sub>1</sub> | Br <sub>5</sub> <sup>1</sup> | 0(10)     | O <sub>1</sub>               | C <sub>1</sub>  | C <sub>2</sub>               | 118.4(5)  |
| Cu <sub>1</sub> <sup>1</sup> | Cu <sub>1</sub> | Br <sub>5</sub>              | 0(10)     | O <sub>1</sub>               | C <sub>1</sub>  | O <sub>2</sub>               | 124.6(5)  |
| Cu <sub>1</sub> <sup>1</sup> | Cu <sub>1</sub> | Br <sub>1</sub> <sup>1</sup> | 0(10)     | O <sub>2</sub>               | C <sub>1</sub>  | C <sub>2</sub>               | 117.0(5)  |
| Cu <sub>1</sub> <sup>1</sup> | Cu <sub>1</sub> | Br <sub>1</sub>              | 0(10)     | Cu <sub>2</sub> <sup>1</sup> | Br <sub>2</sub> | Cu <sub>2</sub>              | 0.0(4)    |
| C <sub>6</sub>               | C <sub>2</sub>  | C <sub>1</sub>               | 109.3(4)  | Br <sub>5</sub>              | Cu <sub>3</sub> | Br <sub>5</sub> <sup>1</sup> | 137.9(4)  |
| C <sub>3</sub>               | C <sub>2</sub>  | C <sub>6</sub>               | 110.9(5)  | Br <sub>3</sub>              | Cu <sub>3</sub> | Br <sub>5</sub>              | 115.6(13) |
| C <sub>3</sub>               | C <sub>2</sub>  | C <sub>1</sub>               | 111.3(5)  | Br <sub>5</sub>              | Cu <sub>4</sub> | Br <sub>5</sub> <sup>1</sup> | 138.7(16) |
| C <sub>4</sub>               | N <sub>4</sub>  | C <sub>3</sub>               | 113.5(5)  | Br <sub>4</sub> <sup>1</sup> | Cu <sub>4</sub> | Br <sub>5</sub>              | 105.5(3)  |
| C <sub>2</sub>               | C <sub>6</sub>  | C <sub>5</sub>               | 110.3(5)  | Br <sub>4</sub>              | Cu <sub>4</sub> | Br <sub>5</sub>              | 97.7(2)   |
| N <sub>4</sub>               | C <sub>3</sub>  | C <sub>2</sub>               | 109.4(5)  | Br <sub>4</sub> <sup>1</sup> | Cu <sub>4</sub> | Br <sub>4</sub>              | 110.6(15) |

<sup>1</sup>1-X,+Y,1/2-Z; <sup>2</sup>1/2+X,1/2+Y,+Z

**Table S5.** Bond angles for [R-NA]<sub>2</sub>[CuBr<sub>4</sub>].

| Atom                         | Atom            | Atom                         | Angle/°   | Atom                         | Atom            | Atom                         | Angle/°     |
|------------------------------|-----------------|------------------------------|-----------|------------------------------|-----------------|------------------------------|-------------|
| Cu <sub>1</sub>              | Br <sub>5</sub> | Cu <sub>3</sub> <sup>1</sup> | 25.8 (3)  | C <sub>5</sub>               | C <sub>4</sub>  | C <sub>3</sub>               | 111.4 (6)   |
| Br <sub>5</sub> <sup>1</sup> | Cu <sub>2</sub> | Br <sub>5</sub>              | 174.4 (6) | Br <sub>5</sub>              | Cu <sub>3</sub> | Br <sub>5</sub> <sup>1</sup> | 137.6 (3)   |
| Br <sub>5</sub> <sup>1</sup> | Cu <sub>2</sub> | Br <sub>2</sub> <sup>1</sup> | 93.9 (2)  | Br <sub>3</sub>              | Cu <sub>3</sub> | Br <sub>5</sub>              | 119.7 (10)  |
| Br <sub>5</sub> <sup>1</sup> | Cu <sub>2</sub> | Br <sub>2</sub>              | 89.1 (2)  | Br <sub>5</sub> <sup>1</sup> | Cu <sub>1</sub> | Br <sub>5</sub>              | 141.3 (7)   |
| Br <sub>5</sub>              | Cu <sub>2</sub> | Br <sub>2</sub> <sup>1</sup> | 89.1 (2)  | Br <sub>1</sub>              | Cu <sub>1</sub> | Br <sub>5</sub> <sup>1</sup> | 96.61 (13)  |
| Br <sub>5</sub>              | Cu <sub>2</sub> | Br <sub>2</sub>              | 93.9 (2)  | Br <sub>1</sub> <sup>1</sup> | Cu <sub>1</sub> | Br <sub>5</sub>              | 96.61 (13)  |
| Br <sub>2</sub> <sup>1</sup> | Cu <sub>2</sub> | Br <sub>2</sub>              | 113.3 (6) | Br <sub>1</sub>              | Cu <sub>1</sub> | Br <sub>5</sub>              | 104.69 (19) |
| C <sub>6</sub>               | C <sub>2</sub>  | C <sub>1</sub>               | 111.3 (6) | Br <sub>1</sub> <sup>1</sup> | Cu <sub>1</sub> | Br <sub>5</sub> <sup>1</sup> | 104.69 (19) |
| C <sub>3</sub>               | C <sub>2</sub>  | C <sub>6</sub>               | 109.3 (6) | Br <sub>1</sub> <sup>1</sup> | Cu <sub>1</sub> | Br <sub>1</sub>              | 112.3 (8)   |
| C <sub>3</sub>               | C <sub>2</sub>  | C <sub>1</sub>               | 110.9 (6) | Br <sub>5</sub> <sup>1</sup> | Cu <sub>4</sub> | Br <sub>5</sub>              | 156 (4)     |
| O <sub>1</sub>               | C <sub>6</sub>  | C <sub>2</sub>               | 118.1 (6) | Br <sub>5</sub> <sup>1</sup> | Cu <sub>4</sub> | Br <sub>4</sub> <sup>1</sup> | 94.9 (6)    |
| O <sub>2</sub>               | C <sub>6</sub>  | O <sub>1</sub>               | 123.4 (6) | Br <sub>5</sub>              | Cu <sub>4</sub> | Br <sub>4</sub>              | 94.9 (6)    |
| O <sub>2</sub>               | C <sub>6</sub>  | C <sub>2</sub>               | 118.4 (6) | Br <sub>5</sub>              | Cu <sub>4</sub> | Br <sub>4</sub> <sup>1</sup> | 96.5 (6)    |
| N <sub>1</sub>               | C <sub>5</sub>  | C <sub>4</sub>               | 112.7 (7) | Br <sub>5</sub> <sup>1</sup> | Cu <sub>4</sub> | Br <sub>4</sub>              | 96.5 (6)    |
| N <sub>1</sub>               | C <sub>1</sub>  | C <sub>2</sub>               | 109.0 (7) | Br <sub>4</sub> <sup>1</sup> | Cu <sub>4</sub> | Br <sub>4</sub>              | 123 (3)     |
| C <sub>2</sub>               | C <sub>3</sub>  | C <sub>4</sub>               | 111.0 (6) | C <sub>5</sub>               | N <sub>1</sub>  | C <sub>1</sub>               | 113.0 (6)   |

<sup>1</sup>+X,1-Y,1-Z
